# Supplementary material
Source: publisher figshare collection journal article supplement (https://diabetesjournals.figshare.com/articles/dataset/_/13667342)
Supplement: Supplementary file 1 [file 1]

## Sheet: delSNAG
Table S3 GO Term of dysreglated genes in Insm1delSNAG mutation
GO biological process complete	fold Enrichment	raw P-value	FDR
regulation of biological quality (GO:0065008)	2.4	1.3e-13	2.05e-09
regulation of transport (GO:0051049)	3.11	3.28e-12	2.59e-08
regulation of hormone levels (GO:0010817)	5.81	8.41e-12	4.42e-08
regulation of secretion by cell (GO:1903530)	4.13	1.36e-09	5.37e-06
regulation of secretion (GO:0051046)	3.77	8.65e-09	2.73e-05
regulation of localization (GO:0032879)	2.31	1.04e-08	2.73e-05
regulation of ion transport (GO:0043269)	4.13	1.37e-08	3.08e-05
localization (GO:0051179)	1.86	5.34e-08	0.000105
regulation of hormone secretion (GO:0046883)	6.33	8.68e-08	0.000152
secretion (GO:0046903)	4.56	1.42e-07	0.000224
endocrine pancreas development (GO:0031018)	17.76	2.96e-07	0.000333
behavior (GO:0007610)	3.92	2.89e-07	0.000351
nervous system development (GO:0007399)	2.35	2.76e-07	0.000363
biological regulation (GO:0065007)	1.36	3.54e-07	0.000372
positive regulation of transport (GO:0051050)	3.15	2.73e-07	0.000391
neuropeptide signaling pathway (GO:0007218)	12.87	3.99e-07	0.000393
pancreas development (GO:0031016)	12.42	5.14e-07	0.000477
positive regulation of secretion by cell (GO:1903532)	4.46	9.54e-07	0.000836
response to chemical (GO:0042221)	1.95	1.74e-06	0.00144
regulation of insulin secretion (GO:0050796)	7.33	1.84e-06	0.00146
regulation of catecholamine secretion (GO:0050433)	13.01	2.03e-06	0.00153
developmental process (GO:0032502)	1.67	2.53e-06	0.00174
regulation of signaling (GO:0023051)	1.97	2.71e-06	0.00178
regulation of cell communication (GO:0010646)	1.98	2.5e-06	0.0018
regulation of exocytosis (GO:0017157)	5.92	4.02e-06	0.00235
positive regulation of secretion (GO:0051047)	4	3.77e-06	0.00238
system development (GO:0048731)	1.79	4.25e-06	0.00239
regulation of amine transport (GO:0051952)	9.1	4.56e-06	0.0024
transport (GO:0006810)	1.9	3.96e-06	0.0024
secretion by cell (GO:0032940)	4.48	4.46e-06	0.00243
response to oxygen-containing compound (GO:1901700)	2.67	5.66e-06	0.00279
positive regulation of hormone secretion (GO:0046887)	7.42	5.56e-06	0.00283
regulation of biological process (GO:0050789)	1.34	6.2e-06	0.00296
regulation of neurotransmitter levels (GO:0001505)	4.66	6.63e-06	0.00308
multicellular organismal process (GO:0032501)	1.51	7.39e-06	0.00333
anatomical structure development (GO:0048856)	1.66	9.39e-06	0.00412
establishment of localization (GO:0051234)	1.83	1.03e-05	0.0044
export from cell (GO:0140352)	4.1	1.17e-05	0.00475
regulation of peptide hormone secretion (GO:0090276)	5.89	1.17e-05	0.00485
response to glucose (GO:0009749)	9.62	1.3e-05	0.00513
neuron differentiation (GO:0030182)	2.82	1.37e-05	0.00527
response to hexose (GO:0009746)	9.33	1.57e-05	0.0059
response to monosaccharide (GO:0034284)	9.24	1.67e-05	0.00613
multicellular organism development (GO:0007275)	1.68	1.91e-05	0.00683
peptide hormone processing (GO:0016486)	29.32	2.03e-05	0.00713
cell communication (GO:0007154)	1.63	2.16e-05	0.00742
generation of neurons (GO:0048699)	2.32	2.25e-05	0.00755
regulation of cellular process (GO:0050794)	1.35	2.57e-05	0.00844
cellular process (GO:0009987)	1.24	2.78e-05	0.00895
response to carbohydrate (GO:0009743)	8.17	3.51e-05	0.0111
neurogenesis (GO:0022008)	2.26	3.74e-05	0.0116
metal ion homeostasis (GO:0055065)	3.28	4e-05	0.0119
chemical homeostasis (GO:0048878)	2.62	4.23e-05	0.0119
hindbrain development (GO:0030902)	6.64	3.99e-05	0.0121
signaling (GO:0023052)	1.62	4.2e-05	0.0121
divalent inorganic cation homeostasis (GO:0072507)	3.64	4.2e-05	0.0123
homeostatic process (GO:0042592)	2.27	4.49e-05	0.0124
signal release (GO:0023061)	6.48	4.72e-05	0.0128
cellular chemical homeostasis (GO:0055082)	3.08	5.02e-05	0.0134
response to extracellular stimulus (GO:0009991)	4.06	5.58e-05	0.0147
modulation of chemical synaptic transmission (GO:0050804)	3.54	5.7e-05	0.0147
regulation of trans-synaptic signaling (GO:0099177)	3.53	5.81e-05	0.0148
regulation of vesicle-mediated transport (GO:0060627)	3.33	5.98e-05	0.015
regulation of epinephrine secretion (GO:0014060)	49.47	6.6e-05	0.0163
anterograde trans-synaptic signaling (GO:0098916)	4.21	8.43e-05	0.0187
social behavior (GO:0035176)	12.22	8.19e-05	0.019
positive regulation of insulin secretion (GO:0032024)	9	7.81e-05	0.019
chemical synaptic transmission (GO:0007268)	4.21	8.43e-05	0.019
axonal transport (GO:0098930)	11.99	8.88e-05	0.0192
neuron projection development (GO:0031175)	3.08	8.41e-05	0.0192
intraspecies interaction between organisms (GO:0051703)	12.22	8.19e-05	0.0193
calcium ion homeostasis (GO:0055074)	3.6	9.03e-05	0.0193
regulation of neurotransmitter transport (GO:0051588)	5.9	8.85e-05	0.0194
neuron development (GO:0048666)	2.84	8.14e-05	0.0195
response to external stimulus (GO:0009605)	2	9.3e-05	0.0196
cellular divalent inorganic cation homeostasis (GO:0072503)	3.56	9.99e-05	0.0207
endocrine system development (GO:0035270)	6.84	0.000102	0.0209
regulation of regulated secretory pathway (GO:1903305)	5.71	0.00011	0.0223
response to nutrient levels (GO:0031667)	4.04	0.000119	0.0237
cell-cell signaling (GO:0007267)	2.85	0.000123	0.0242
cation homeostasis (GO:0055080)	2.96	0.000128	0.0249
movement of cell or subcellular component (GO:0006928)	2.33	0.000131	0.0249
trans-synaptic signaling (GO:0099537)	4	0.00013	0.0251
cell morphogenesis involved in neuron differentiation (GO:0048667)	3.69	0.000134	0.0251
adenylate cyclase-modulating G protein-coupled receptor signaling pathway (GO:0007188)	5.53	0.000136	0.0253
ion homeostasis (GO:0050801)	2.82	0.00014	0.0257
cellular metal ion homeostasis (GO:0006875)	3.23	0.000143	0.026
inorganic ion homeostasis (GO:0098771)	2.91	0.000157	0.0281
feeding behavior (GO:0007631)	7.84	0.00016	0.0284
peptide hormone secretion (GO:0030072)	10.15	0.000185	0.0325
carbohydrate transport (GO:0008643)	9.99	0.000198	0.0343
central nervous system development (GO:0007417)	2.72	0.000212	0.0364
axonal transport of mitochondrion (GO:0019896)	30.45	0.000218	0.0366
pons development (GO:0021548)	30.45	0.000218	0.037
cellular calcium ion homeostasis (GO:0006874)	3.43	0.000255	0.0423
synaptic signaling (GO:0099536)	3.66	0.00027	0.0444
sensory perception of smell (GO:0007608)	< 0.01	0.000278	0.0453
neuron projection morphogenesis (GO:0048812)	3.39	0.000285	0.046
cellular homeostasis (GO:0019725)	2.64	0.000294	0.0469
response to organic substance (GO:0010033)	1.87	0.000298	0.0471
axo-dendritic transport (GO:0008088)	9.04	0.000308	0.0481
plasma membrane bounded cell projection morphogenesis (GO:0120039)	3.35	0.000313	0.0485
regulation of serotonin biosynthetic process (GO:1905627)	> 100	0.000334	0.0498
metencephalon development (GO:0022037)	6.82	0.000326	0.05
positive regulation of epinephrine secretion (GO:0032812)	> 100	0.000334	0.0502
axon guidance (GO:0007411)	4.82	0.000333	0.0505
